# Supplementary material for: Inhibiting HDAC1 Enhances the Anti-Cancer Effects of Statins through Downregulation of GGTase-Iβ Expression
Source: MDPI journal article supplement (doi:10.3390/ijms18051010), 2017-05-08
Supplement: s1 [file s1]

# Inhibiting HDAC1 Enhances the Anti-Cancer Effects of Statins through Downregulation of GGTase-I $\beta$ Expression

Ran Li and Ye-Hua Gan

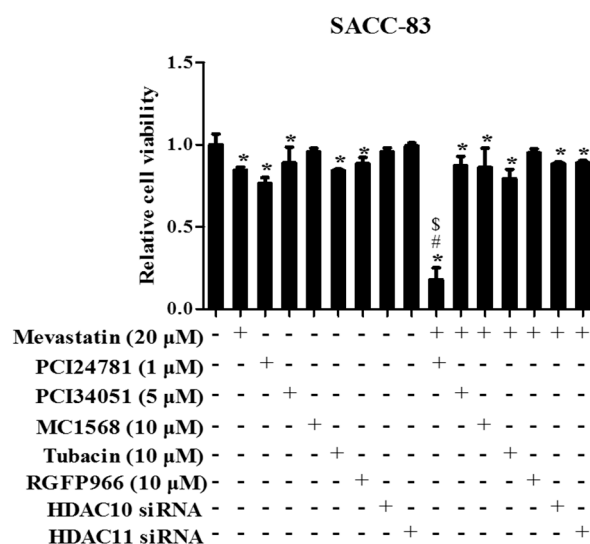

**Figure S1.** HDAC1 & 2 may be involved in the enhancement of mevastatin-induced cell proliferation inhibition by pan-HDAC inhibitor. SACC-83 cells were exposed to various kinds of HDAC inhibitors or siRNAs (PCI24781, inhibitor of HDAC1, 2, 3, 6, 8, 10; PCI34051, inhibitor of HDAC3; MC1568, inhibitor of HDAC4, 5, 7, 9; tubacin, inhibitor of HDAC6; RGFP966, inhibitor of HDAC8; siRNA of HDAC10 or 11), or together with mevastatin for 48 h. Cell viability was assessed by CCK8 assay. \* $P < 0.05$  vs. the control group; #  $P < 0.05$  vs. mevastatin group; \$  $P < 0.05$  vs. PCI24781 group,  $n = 4$ .

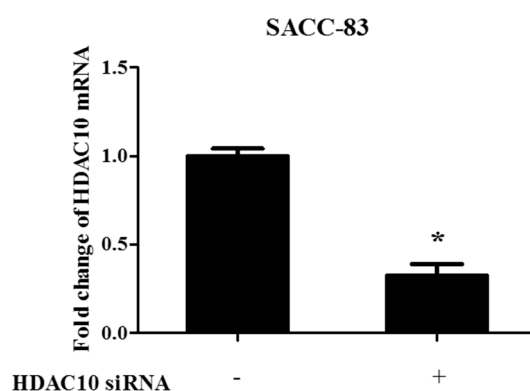

**Figure S2.** Confirmation of HDAC10 knockdown efficiency. siRNA of HDAC10 was transfected to SACC-83 cells. After 48 h treatment, total RNA was extracted and the mRNA expression of HDAC10 was assessed by real-time PRC. \*  $P < 0.05$ , vs. control group,  $n = 3$ .

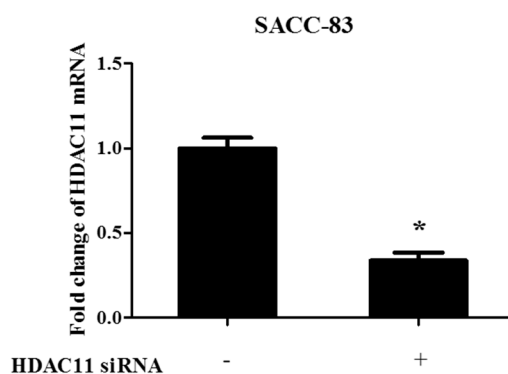

**Figure S3.** Confirmation of HDAC11 knockdown efficiency. siRNA of HDAC11 was transfected to SACC-83 cells. After 48 h treatment, total RNA was extracted and the mRNA expression of HDAC11 was assessed by real-time PRC. \*  $P < 0.05$ , vs. control group,  $n = 3$ .

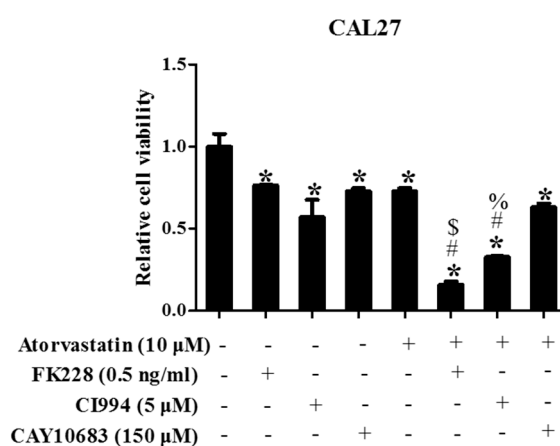

**Figure S4.** Inhibiting HDAC1, but not HDAC2, enhanced the atorvastatin-induced inhibition of cell proliferation in CAL-27 cells. CAL-27 cells were either exposed to various kinds of HDAC inhibitors (FK228, inhibitor for HDAC1&2; CI994, inhibitor for HDAC1; CAY10683, inhibitor for HDAC2), or along with atorvastatin for 48 h. Cell viability was assessed by a CCK8 assay. \*  $P < 0.05$  vs. the control group; #  $P < 0.05$  vs. atorvastatin group; \$  $P < 0.05$  vs. FK228 group; %  $P < 0.05$  vs. CI994 group,  $n = 4$ .

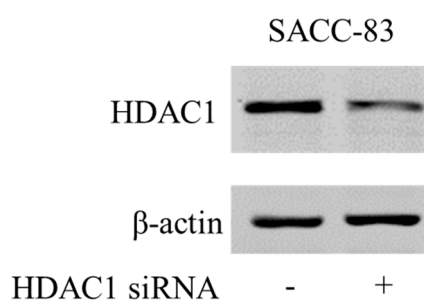

**Figure S5.** Confirmation of HDAC1 knockdown efficiency. SACC-83 cells were transfected with scrambled or HDAC1 siRNA; after 30 h treatment, total protein was extracted and subjected to Western blot for analysis.

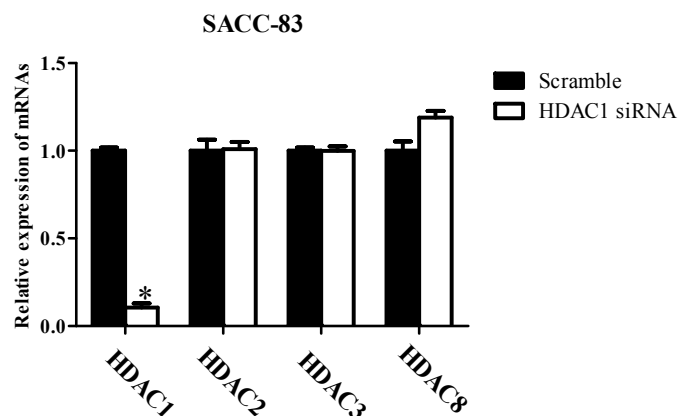

**Figure S6.** Confirmation of HDAC1 siRNA specificity. Scrambled and HDAC1 siRNAs were transfected to SACC-83 cells for 30 h, then total RNA was extracted and subjected to real-time PCR. \*  $P < 0.05$ .  $n = 3$ .

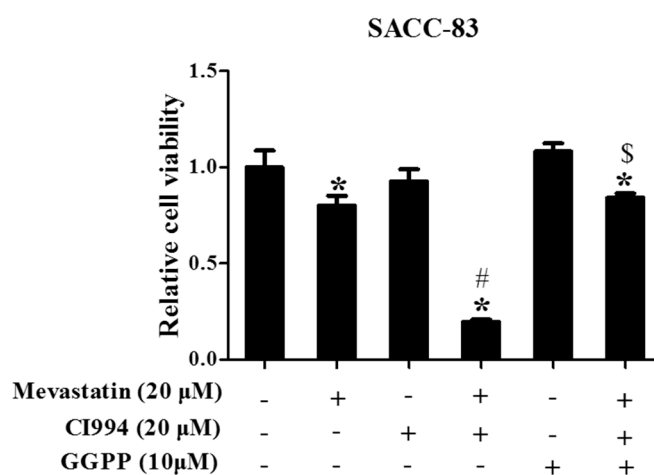

**Figure S7.** GGPP abolished the enhancement of mevastatin-induced inhibition of cell viability by CI994. SACC-83 cells were exposed to different kinds of treatments for 48 h, and then cell viability was assessed by a CCK8 assay. \*  $P < 0.05$  vs. the control group; #  $P < 0.05$  vs. atorvastatin or CI994 group; §  $P < 0.05$  vs. the group of combinational treatment with mevastatin and CI994,  $n = 4$ .

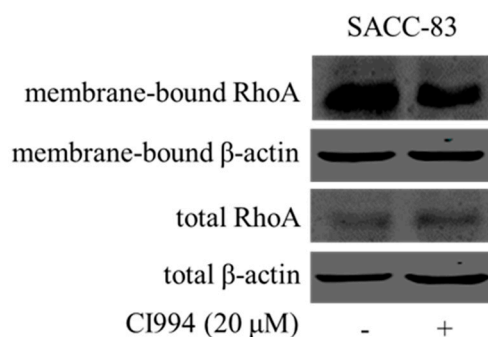

**Figure S8.** CI994 (HDAC1 inhibitor) inhibited membrane-translocation (activation) of RhoA. SACC-83 cells were exposed to CI994 (20  $\mu$ M) for 30 h, and then membrane and total proteins were extracted and subjected to Western blot for analysis.

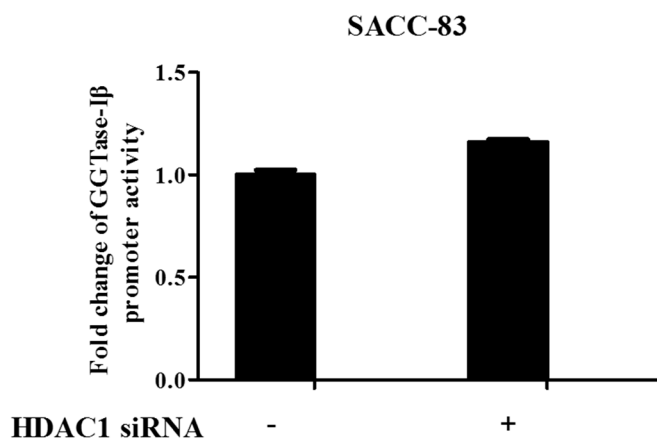

**Figure S9.** Inhibiting HDAC1 did not influence the promoter activity of GGTase-I $\beta$ . Scrambled and HDAC1 siRNA were transfected to SACC-83 cells. After 12 h transfection, pGL3-enhancer vector containing GGTase-I $\beta$  promoter region was transfected to the cells, and incubated for another 36 h. Total protein was extracted and subjected to luciferase assay for analysis,  $n = 4$ .

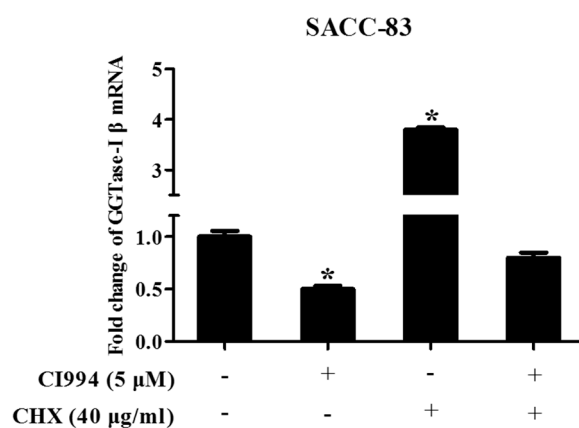

**Figure S10.** Inhibition of new protein synthesis by CHX rescued CI994-induced downregulation of GGTase-I $\beta$  mRNA. SACC-83 cells were exposed to either CI994, or cycloheximide (CHX), or both for 30 h. mRNA expression of GGTase-I $\beta$  was quantified by real-time PCR. \*  $P < 0.05$  vs. the control group,  $n = 3$ .

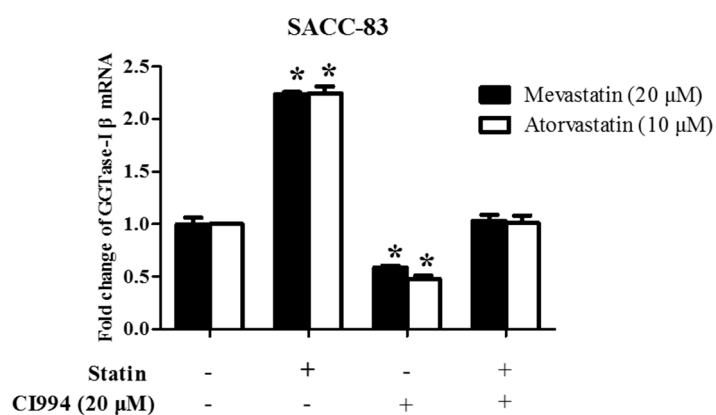

**Figure S11.** CI994 blocked statin-induced upregulation of GGTase-I $\beta$  mRNA. SACC-83 cells were treated with statin (mevastatin 20  $\mu$ M/atorvastatin 10  $\mu$ M), or CI994 (20  $\mu$ M), or both for 30 h. The mRNA expression of GGTase-I $\beta$  was quantified by real-time PCR. \*  $P < 0.05$  vs. the control group,  $n = 3$ .

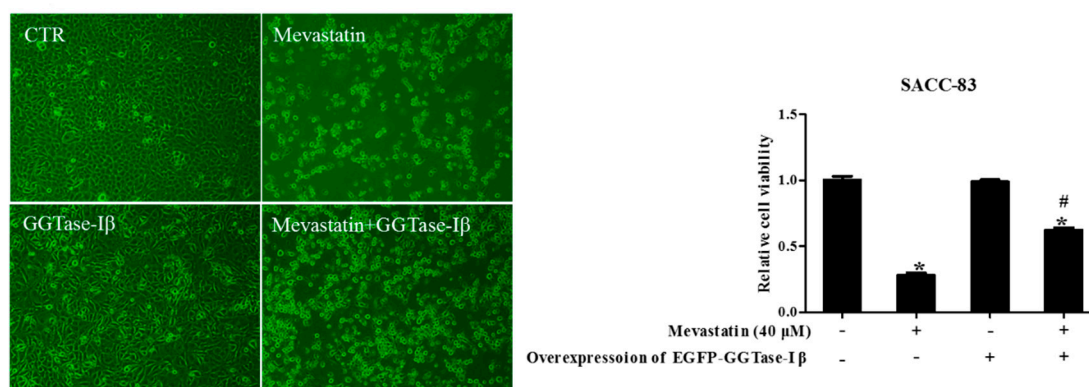

**Figure S12.** Overexpression of GGTase-I $\beta$  partially rescued mevastatin-induced inhibition of cell viability. Microscopy photographs and cell viability of SACC-83 cells. SACC-83 cells were transfected with either EGFP fused GGTase-I $\beta$ , or an empty vector (pEGFP-C1); after 12 h transfection, cells were exposed to mevastatin at a concentration of 40  $\mu$ M for another 48 h. \*  $P < 0.05$  vs. the control group; #  $P < 0.05$  vs. mevastatin group.

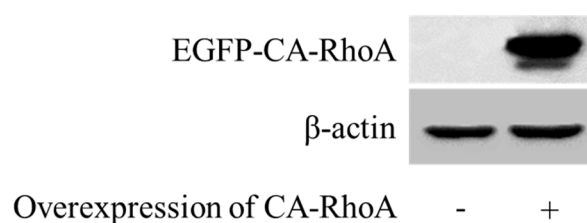

**Figure S13.** Confirmation of CA-RhoA overexpression. SACC-83 cells were either stably transfected with EGFP-fused constitutively active RhoA or not. Total cell lysate was collected and subject to analysis by Western blot assay.
